# Supplementary material for: Danhong Injection Alleviates Postoperative Intra-abdominal Adhesion in a Rat Model
Source: PubMed Central journal article supplement (PMC6721271; doi:10.1155/2019/4591384), 2019-08-19
Supplement: 4591384.f1.pdf [file 4591384.f1.pdf]

**Supplemental Table 1. Nair et al. scoring system**

|   |                                                                                                                                                           |
|---|-----------------------------------------------------------------------------------------------------------------------------------------------------------|
| 0 | No adhesions                                                                                                                                              |
| 1 | Between viscera or between visceral viscus and abdominal wall (one band)                                                                                  |
| 2 | Between viscera or between visceral viscus and abdominal wall (two bands)                                                                                 |
| 3 | Between viscera, between visceral viscus and abdominal wall (more than two bands) or multiple intestinal adhesions without adhesion to the abdominal wall |
| 4 | Direct adhesion of the viscera to the abdominal wall (number and size of bands not important)                                                             |

**Supplemental Table 2. Histopathological criteria for inflammatory score**

| Score | Degree of inflammation                                    |
|-------|-----------------------------------------------------------|
| 0     | No inflammation                                           |
| 1     | Giant cells, lymphocytes, and plasma cells                |
| 2     | Giant cells, plasma cells, eosinophils, and neutrophils   |
| 3     | Inflammatory cell infiltration and microabscess formation |
